# Supplementary material for: The Impact of Climate Change on Malaria Incidence in Bonaberi and Tombel Districts, Cameroon
Source: Research Square preprint supplement (doi:10.21203/rs.3.rs-3258929/v1), 2023-08-25
Supplement: Supplementary file 1 [file a5022af773c6c02a91758822.docx]

The Impact of Climate Change on Malaria

Incidence in Bonaberi and Tombel Districts, Cameroon

| **Table1;** Details of CORDEX used to force VECTRI in this study | CODEX Climate Models | Reference | [**27**] | [**28**] | [**27**] | [**28**] | [**26**] |
| --- | --- | --- | --- | --- | --- | --- | --- |
| Future Scenarios | RCP2.6,RCP8.5 | RCP2.6,RCP8.5 | RCP2.6,RCP8.5 | RCP2.6,RCP8.5 | RCP2.6,RCP8.5 |
| Resolution | 0x 1.125 | 0x 1.9 | 0x 1.40 | 0x 1.9 | 0x 1.25 |
| Institution and Country | ESEarth-SystemModelConsortiumResolution,Germany1.125 | MaxPlanckInstituteforMeteorologyA1.9 | Atmosphere and Ocean Research Institute (University of Tokyo)1.40 | NorwegianClimateCentre2.5 | MetOfficeHadleyCentre1.875 |
| Model name | EC-EARTH- | MPI-ESM-LR | MIROC-5 | NorESM1-M | HadGEM2-ES |
